# Supplementary material for: Microbiomics and volatile metabolomics-based investigation of changes in quality and flavor of oat (Avena sativa L.) silage at different stages
Source: Front Plant Sci. 2023 Nov 6;14:1278715. doi: 10.3389/fpls.2023.1278715 (PMC10657850; doi:10.3389/fpls.2023.1278715)
Supplement: Supplementary Table 1 — Volatile metabolites detected by GC-MS. [file Table_1.xlsx]

## Sheet: Sheet2
Compounds	Class I	Odor	VIP	Type
3-Imidazol-1-ylpropanenitrile	Heterocyclic compound	-	1.31824	down
AcetAldehyde, tetramer	Aldehyde	-	1.31803	down
Butanoic Acid, 3-methyl-	Acid	sour, stinky, feet, sweaty, cheese, tropical	1.31801	down
2-Methylbut-2-en-1-yl acetate	Alcohol	-	1.31794	down
1-(1-ethoxyethoxy)-Propane	Ether	-	1.31756	down
2-Nonenal, (E)-	Aldehyde	fatty, green, cucumber, aldehydic, citrus	1.31753	down
3-Cyclohexen-1-ol, 1-methyl-4-(1-methylethyl)-	Terpenoids	dry, woody, musty	1.31717	down
BenzenAmine, 2,6-diethyl-	Amine	-	1.31617	down
4-Isopropyl-6-methyl-1-methylene-1,2,3,4-tetrahydronaphthalene	Terpenoids	-	1.31611	down
2-Butanol, 2,3-dimethyl-, acetate	Ester	-	1.31583	down
Pyrazine, 2,5-dimethyl-	Heterocyclic compound	cocoa, roasted, nuts, roast, beef, woody, grass, medical	1.31559	down
Phenol, 2,3,6-trimethyl-	Phenol	-	1.31558	down
Cyclohexanone, 5-methyl-2-(1-methylethyl)-	Terpenoids	minty	1.31491	down
Acetic Acid, phenoxy-	Acid	sour, sweet	1.31439	down
1,4-Methano-1H-indene, octahydro-4-methyl-8-methylene-7-(1-methylethyl)-, [1S-(1.alpha.,3a.beta.,4.alpha.,7.alpha.,7a.beta.)]-	Terpenoids	-	1.31417	down
Pyrazine, trimethyl-	Heterocyclic compound	nutty, skin, earthy, powdery, cocoa, baked, potato, roasted, peanut, hazelnut, musty	1.31372	up
2-Acetylbenzofuran	Heterocyclic compound	sweet, coumarinic, floral, orangeflower, tropical, neroli, lactonic, honeysuckle, honey	1.31369	down
TetraSulfur compounds, dimethyl	Sulfur compounds	garlic, meaty	1.31367	down
1H-3a,7-Methanoazulene, 2,3,4,7,8,8a-hexahydro-3,6,8,8-tetramethyl-, (3R,3aS,7S,8aR)-	Terpenoids	-	1.31365	down
BenzeneacetAldehyde, .alpha.-(2-methylpropylidene)-	Aldehyde	sweet, cocoa, nutty, rose, powdery	1.31347	up
(1R,3aR,4aR,8aR)-1,4,4,6-Tetramethyl-1,2,3,3a,4,4a,7,8-octahydrocyclopenta[1,4]cyclobuta[1,2]benzene	Terpenoids	-	1.31344	down
3-Hexen-1-ol, (Z)-	Alcohol	fresh, green, grass, foliage, vegetable, herbal, oily	1.3134	up
Benzeneacetic acid, 2-methylpropyl ester	Ester	sweet, floral, honey, chocolate, amber	1.31323	down
1-Butanone, 2-hydroxy-1-phenyl-	Ketone	-	1.31296	down
2-Hydroxymethylbenzimidazole	Heterocyclic compound	-	1.31279	down
3-Pentenoic Acid, 2,2-dimethyl-	Acid	-	1.31269	down
3-Phenylpropanol	Alcohol	sweet, spicy, cinnamyl, mignonette, hyacinth, balsam	1.31164	down
2-Propenoic acid, 3-phenyl-, ethyl ester, (E)-	Ester	floral, honey, balsamic	1.31125	down
Bicyclo[3.1.0]hex-3-en-2-one, 5-(1-methylethyl)-	Ketone	-	1.31084	down
2-Propenal, 3-(2-furanyl)-	Heterocyclic compound	green, grassy, fruity, spicy, vanilla, nutty, woody, cinnamon	1.31069	down
3-Octanol	Alcohol	earthy, mushroom, herbal, melon, citrus, woody, spicy, minty	1.31069	down
Butanoic acid, 2-methyl-, hexyl ester	Ester	green, waxy, fruity, apple, spicy, tropical	1.31045	down
2-Propenoic Acid, 3-phenyl-	Acid	balsam, sweet, storax	1.31044	down
Phenol, 4-(2-propenyl)-	Aromatics	phenolic, medicil, herbal	1.31035	up
2-Undecanone, 6,10-dimethyl-	Ketone	dry, musty	1.31015	up
Ethanone, 1-(1H-pyrazol-4-yl)-	Heterocyclic compound	-	1.30973	down
Ethanone, 1-(4-ethylphenyl)-	Ketone	floral, hawthorn	1.30935	down
2-Buten-1-ol, 3-methyl-, acetate	Ester	sweet, fresh, banana, fruity, jasmin, ripe heliotrope, balsam	1.30933	down
2-Methyl-7-exo-vinylbicyclo[4.2.0]oct-1(2)-ene	Hydrocarbons	-	1.30916	down
1-Pentanone, 1-(4-methylphenyl)-	Ketone	-	1.3091	down
2,3-Dimethyl-5-ethylpyrazine	Heterocyclic compound	burnt, popcorn, roasted, cocoa	1.30909	up
Propanoic acid, 2-methyl-, 2-phenylethyl ester	Ester	floral, fruity, rose, tea, rose, peach, pastry	1.30882	down
Methyl 5-hydroxynicotinate	Ester	-	1.30859	down
Ethanone, 1-(2,4-dimethylphenyl)-	Ketone	floral, woody, sweet, mimosa, minty	1.30856	up
Phenol, 4-ethyl-2-methoxy-	Phenol	clove, candy	1.30856	down
(1R,3aS,8aS)-7-Isopropyl-1,4-dimethyl-1,2,3,3a,6,8a-hexahydroazulene	Terpenoids	-	1.30795	down
3-Methoxybenzyl Alcohol	Alcohol	-	1.30784	down
Butanethioic acid, 3-methyl-, S-(1-methylpropyl) ester	Ester	spicy, galbanum, green, herbal	1.30757	down
2-Propanol, 1-(dimethylamino)-, acetate (ester)	Ester	-	1.30727	up
Isoquinoline	Heterocyclic compound	sweet, balsam, herbal, benzaldehyde, anise	1.30698	down
Benzenemethanol, 4-methyl-.alpha.-(1-methyl-2-propenyl)-, (R*,R*)-	Alcohol	-	1.30677	down
Phenol, 2,4-dichloro-	Phenol	-	1.30661	down
Thieno[2,3-b]thiophene,2-methyl-	Heterocyclic compound	-	1.30589	down
Pyrazine, tetramethyl-	Heterocyclic compound	nutty, musty, chocolate, coffee, cocoa, brown, lard, burnt	1.30588	up
3-Hexanone, 2,2-dimethyl-	Ketone	-	1.30561	up
(3S,3aS,6R,8aS)-3,8,8-Trimethyl-7-methyleneoctahydro-1H-3a,6-methanoazulene	Terpenoids	-	1.30544	down
3-FurAldehyde	Heterocyclic compound	-	1.30527	down
(3R,6R)-2,2,6-Trimethyl-6-vinyltetrahydro-2H-pyran-3-ol	Heterocyclic compound	citrus, green	1.30525	down
Benzene, 1-methyl-2-(1-ethylpropyl)-	Aromatics	-	1.30508	down
Cyclohexene, 4-ethenyl-4-methyl-3-(1-methylethenyl)-1-(1-methylethyl)-, (3R-trans)-	Terpenoids	sweet, herbal, woody	1.30473	down
Formic acid, octyl ester	Ester	fruity, rose, orange, waxy, cucumber	1.30451	down
Pyrazine, 2,6-dimethyl-	Heterocyclic compound	ethereal, cocoa, nutty, roasted, roasted, meaty, beefy, brown, coffee, buttermilk	1.30441	up
2,6-Heptanedione, 3-acetyl-	Ketone	-	1.30408	down
1-Nonanol	Alcohol	fresh, clean, fatty, floral, rose, orange, dusty, wet, oily	1.3038	down
Cyclohexanol, 1-methyl-4-(1-methylethyl)-, trans-	Terpenoids	-	1.30374	down
(+)-cis-Verbenol, acetate	Ester	-	1.30279	down
Cyclohexane, 1-ethenyl-1-methyl-2,4-bis(1-methylethenyl)-, (1.alpha.,2.beta.,4.beta.)-	Terpenoids	herbal, waxy, fresh	1.30244	down
1-Hexanol	Alcohol	ethereal, fusel, oil, fruity, alcoholic, sweet, green	1.3019	up
1,2-Ethanediol, monobenzoate	Ester	-	1.30189	down
6-Ethyl-5,6-dihydro-2H-pyran-2-one	Heterocyclic compound	-	1.30155	down
Butane, 1,1'-oxybis[4-chloro-	Ether	-	1.30115	down
1,6,10-Dodecatriene, 7,11-dimethyl-3-methylene-	Terpenoids	-	1.30104	up
Glutarimide	Amine	-	1.30086	down
Carvone oxide, trans-	Terpenoids	-	1.30049	down
cis-Chrysanthenol	Terpenoids	-	1.30033	down
4-Hexen-1-ol, 5-methyl-2-(1-methylethenyl)-, (R)-	Terpenoids	herbal	1.3003	down
Bicyclo[3.1.1]hept-3-en-2-one, 4,6,6-trimethyl-, (1S)-	Terpenoids	spicy, mint, camphor	1.30016	down
Methyl salicylate	Ester	caramel, peppermint	1.3	down
1,5-Cyclooctadiene, 3-(1-methyl-2-propenyl)-	Hydrocarbons	-	1.29981	down
4H-Pyran-4-one, 5-hydroxy-2-(hydroxymethyl)-	Heterocyclic compound	-	1.29926	up
2-Nonanone, 3-(hydroxymethyl)-	Ketone	fresh, sweet, green, weedy, earthy, herbal	1.29764	up
Phenol, 2-methoxy-4-(1-propenyl)-	Phenol	sweet, spicy, clove, woody, allspice, cartion, floral	1.29732	down
4-Tridecanone	Ketone	-	1.29684	up
2,6,10-Trimethyltridecane	Hydrocarbons	-	1.29673	up
Cyclopentane, 1,1,3-trimethyl-	Hydrocarbons	-	1.29656	up
Cyclopentanecarbonitrile, 3-(1-methylethylidene)-	Nitrogen compounds	-	1.29653	down
Cubenene	Terpenoids	spicy, fruity, mango	1.29565	down
Cyclohexane, 2-ethenyl-1,1-dimethyl-3-methylene-	Hydrocarbons	-	1.29505	down
2,2'-Bifuran, octahydro-	Heterocyclic compound	-	1.29439	down
Quinoxaline, 2-methyl-	Heterocyclic compound	toasted, coffee, nutty, fruity	1.29432	down
4-Pyridinecarboxylic acid, ethyl ester	Heterocyclic compound	-	1.29235	down
2,6-Octadienal, 3,7-dimethyl-, (Z)-	Terpenoids	sweet, citral, lemon, peel	1.29206	down
1,2,4-Trimethoxybenzene	Aromatics	-	1.2901	down
(-)-Myrtenol	Terpenoids	woody, pine, balsam, sweet, mint	1.28971	up
2-Nonen-1-ol, (E)-	Alcohol	waxy, green, violet, melon	1.28969	down
Acetic acid, nonyl ester	Ester	waxy, clean, green, tropical, fruity	1.28948	down
Butanoic Acid, 3-hydroxy-3-methyl-	Acid	amber, woody, cedarwood, ambergris	1.28815	up
5-Nonen-4-one, 6-methyl-	Ketone	-	1.28791	down
12-Oxatetracyclo[4.3.1.1(2,5).1(4,10)]dodecane, 11-isopropylidene-	Hydrocarbons	-	1.28764	down
Acetic Acid, cinnamyl ester	Acid	sweet, floral, spicy, balsam, cinnamon	1.28756	down
Carbonochloridodithioic acid, methyl ester	Others	-	1.28666	up
Cyclopropanecarboxylic Acid, 2,2-dimethyl-3-(2-methyl-1-propenyl)-, (1R-trans)-	Terpenoids	-	1.2864	down
Propanoic acid, 2,2-dimethyl-, pentyl ester	Ester	-	1.28628	down
1-Hepten-3-one	Ketone	metallic	1.28599	down
2-Methoxy-4-vinylphenol	Aromatics	spicy, raisin	1.28591	down
2-Propenoic acid, butyl ester	Ester	-	1.28586	up
4-Aminopyridine	Heterocyclic compound	-	1.28561	down
3-Cyclohexene-1-carboxAldehyde, 4-(4-methyl-3-pentenyl)-	Aldehyde	citrus, greasy, aldehydic, floral, marine	1.2854	up
(S)-3,3,6-Trimethylhepta-1,5-dien-4-yl acetate	Ester	-	1.28483	down
Dicyandiamide	Nitrogen compounds	-	1.28407	up
Di-epi-.alpha.-cedrene	Terpenoids	-	1.28405	down
5-Hexenal, 4-methylene-	Hydrocarbons	-	1.28363	up
(6,6-dimethyl-2-bicyclo[3.1.1]hept-2-enyl)methyl 2-methylpropanoate	Ester	fruity, woody, pine	1.28345	down
Acetic acid, 2-phenylethyl ester	Ester	floral, rose, sweet, honey, fruity, tropical	1.28227	down
Limonene oxide, cis-	Terpenoids	fresh, citrus	1.28198	down
4,7,7-Trimethylbicyclo[4.1.0]hept-3-en-2-one	Ketone	-	1.28197	down
2,2'-Ethylidenebis(5-methylfuran)	Heterocyclic compound	-	1.28194	down
Decane, 4-methyl-	Hydrocarbons	Pungent	1.28082	down
Ethanone, 1-(3-hydroxyphenyl)-	Ketone	-	1.28027	down
Geranyl isobutyrate	Ester	sweet, floral, fruity, green, peach, apricot, rose	1.28004	down
Pentadecane, 2,6,10,14-tetramethyl-	Hydrocarbons	-	1.27976	up
2-Octanone	Ketone	earthy, weedy, natural, woody, herbal	1.27899	up
2,4,4-Trimethyl-3-(3-methylbutyl)cyclohex-2-enone	Ketone	-	1.27844	down
Benzeneacetic acid, 4-(1,1-dimethylethyl)-, methyl ester	Ester	dairy, buttermilk, leafy, creamy, green, waxy, fatty, hyacinth, melon, rind, rubbery	1.27803	down
1-Naphthalenemethanol	Alcohol	-	1.27687	up
Decanal	Aldehyde	sweet, aldehydic, waxy, orange, peel, citrus, floral	1.27621	up
1-Octanol	Alcohol	intense citrus, roses	1.27582	down
Formic acid, 2-phenylethyl ester	Ester	rose, green, hyacinth, watercress, herbal	1.27573	down
Lilac Aldehyde D	Aldehyde	sweet, flowery	1.27544	down
trans,cis-2,6-Nonadien-1-ol	Alcohol	green, cucumber, oily, violet, leafy	1.27541	down
Cyclooctanemethanol	Alcohol	-	1.27435	down
Benzoic acid, 2-propenyl ester	Ester	sweet, floral, cherry, berry	1.27318	up
2-Thiophenemethanethiol	Heterocyclic compound	roast, coffee, fishy	1.27221	up
Benzyl Alcohol	Alcohol	floral, rose, phenolic, balsamic	1.27062	up
Pentadecanoic acid, ethyl ester	Ester	honey, sweet	1.27046	up
Formic acid butyl ester	Ester	fruity, plum, rum, brandy	1.2689	up
1-Cyclohexene-1-carboxAldehyde, 4-(1-methylethenyl)-	Aldehyde	fresh, green, herbal, grassy, sweet, mint, cumin	1.2689	up
Iridomyrmecin	Terpenoids	-	1.26868	down
.alpha.-Pinene	Terpenoids	fresh, camphor, sweet, pine, earthy, woody	1.2685	up
Tetradecanoic acid, ethyl ester	Ester	sweet, waxy, violet, orris	1.2684	up
Bicyclo[3.2.1]oct-2-ene, 3-methyl-4-methylene-	Terpenoids	-	1.26839	down
2-Octenoic Acid	Acid	-	1.2681	down
Phenol, 2-(1,1-dimethylethyl)-	Phenol	-	1.26803	up
Octanoic acid, methyl ester	Ester	fruity, citrus-like	1.26744	down
Undecanal	Aldehyde	waxy, soapy, floral, aldehydic, citrus, green, fatty, fresh	1.26718	down
1H-Cycloprop[e]azulen-4-ol, decahydro-1,1,4,7-tetramethyl-, [1aR-(1a.alpha.,4.beta.,4a.beta.,7.alpha.,7a.beta.,7b.alpha.)]-	Terpenoids	sweet, green, herbal, fruity, tropical, minty	1.26686	up
(E)-.beta.-Famesene	Terpenoids	woody, citrus, herbal, sweet	1.26677	up
Cyclohexene, 1-methyl-4-(1-methylethylidene)-	Terpenoids	citrus, pine	1.26668	up
BenzenAmine, 2,5-dimethyl-	Amine	-	1.26644	down
2-hydroxy-BenzAldehyde	Aldehyde	medical, spicy, cinnamon, wintergreen, cooling	1.26632	up
1-Butanol, 2-methyl-, acetate	Ester	over ripe fruit, sweet, banana, juicy fruit	1.26601	down
1H-Carbazole, 2,3,4,9-tetrahydro-	Heterocyclic compound	-	1.26548	up
Tetradecanoic Acid	Acid	waxy, fatty, soapy, coconut	1.26532	up
trans-Cinnamic Acid	Acid	balsam, sweet, storax	1.26527	down
Cyclohexanone, 5-methyl-2-(1-methylethyl)-, trans-	Terpenoids	minty	1.26485	down
Spiro[4.5]dec-7-ene, 1,8-dimethyl-4-(1-methylethenyl)-, [1S-(1.alpha.,4.beta.,5.alpha.)]-	Terpenoids	-	1.26388	down
o-Mentha-1(7),8-dien-3-ol	Terpenoids	-	1.26369	down
(Z)-Ethyl pentadec-9-enoate	Ester	-	1.26367	up
Pantolactone	Ester	burnt, roasted bread	1.26302	down
5,9-Undecadien-2-one, 6,10-dimethyl-, (E)-	Ketone	fresh, green, fruity, waxy, rose, woody, magnolia, tropical	1.26267	up
2,7-Octadien-4-ol, 2-methyl-6-methylene-, (S)-	Terpenoids	pine, balsamic	1.26244	down
Methional	Aldehyde	musty, potato, tomato, earthy, vegetable, creamy	1.26216	up
1-Octadecene	Hydrocarbons	-	1.26148	up
n-Butyl laurate	Ester	waxy, soapy, fruity, peanut	1.2614	up
Hexadecane, 2,6,10,14-tetramethyl-	Hydrocarbons	-	1.26041	up
2-Octen-1-ol, (E)-	Alcohol	green, citrus, vegetable, fatty	1.25909	down
Dispiro[1,3-dioxolane-2,2'-bicyclo[2.2.1]heptane-3',2''-(1'',3''-dioxolane)], 4',7',7'-trimethyl-	Hydrocarbons	-	1.25819	up
Benzoic acid, methyl ester	Ester	phenolic, wintergreen, almond, floral, canga	1.25813	down
1-Undecene, 9-methyl-	Hydrocarbons	-	1.25775	up
2-Hexenal, (E)-	Aldehyde	green, grassy	1.25717	up
2,6,10-Dodecatrienoic acid, 3,7,11-trimethyl-, methyl ester, (E,E)-	Ester	-	1.25707	up
Decanoic acid, ethyl ester	Ester	sweet, waxy, fruity, apple, grape, oily, brandy	1.25687	up
Pentanoic acid, 4-methyl-, methyl ester	Ester	fruity, sweet, banana, pineapple, cheese	1.25683	down
2-Furanmethanol, 5-ethenyltetrahydro-.alpha.,5-dimethyl-	Heterocyclic compound	-	1.2568	down
4-Methylhexyl 3-methylbutanoate	Ester	-	1.25674	down
Benzeneacetic acid, methyl ester	Ester	floral, honey, spice, waxy, sweet	1.25671	down
Benzenepropanoic acid, methyl ester	Ester	honey, fruity, wine, balsam, floral	1.25609	down
1,4-Dithiane	Amine	sulfurous, solvent, garlic, onion, pyridine	1.25421	up
Citronellal	Terpenoids	sweet, dry, floral, herbal, waxy, aldehydic, citrus	1.25358	up
(4R,4aS,6S)-4,4a-Dimethyl-6-(prop-1-en-2-yl)-1,2,3,4,4a,5,6,7-octahydronaphthalene	Terpenoids	-	1.25348	down
Pinocarvone	Terpenoids	minty	1.25104	down
Butanoic acid, 1-methylhexyl ester	Ester	fruity, green, vegetable, cheesy, walnut	1.25022	down
1H-Indene, 1,1,3-trimethyl-	Aromatics	-	1.25021	down
Glycerol 1,2-diacetate	Ester	-	1.24866	down
Naphthalene, 2-methyl-	Aromatics	sweet, floral, woody	1.24862	down
BenzAldehyde, 4-ethyl-	Aldehyde	bitter, almond, sweet, anise	1.24845	up
Megastigma-4,6(Z),8(E)-triene	Hydrocarbons	-	1.24759	down
2-Hexanone	Ketone	fruity, fungal, meaty, buttery	1.24692	up
Acetophenone, 4'-hydroxy-	Ketone	mild, sweet, hawthorn, balsam, mimosa	1.24632	up
1H-Pyrrole-2-carboxAldehyde	Heterocyclic compound	musty, beefy, coffee	1.24599	up
2-Furanmethanol, 5-ethenyltetrahydro-.alpha.,.alpha.,5-trimethyl-, cis-	Heterocyclic compound	earthy, floral, sweet, woody	1.24534	down
1-methyl-2-nitro-Benzene	Aromatics	-	1.24457	down
Furan, 2-pentyl-	Heterocyclic compound	fruity, green, earthy, beany, vegetable, metallic	1.24383	up
Thiophene, 2-pentyl-	Heterocyclic compound	fatty, chicken, coup, cranberry, roasted hazelnut, corn, roasted barley, fermented, meaty, bloody	1.24314	down
Butanoic acid, 2-methyl-, 3,7-dimethyl-2,6-octadienyl ester, (E)-	Ester	fruity, apple, rose	1.24228	up
Phenol, 3-ethyl-	Phenol	musty	1.2419	down
Caryophyllene	Terpenoids	sweet, woody, spice, clove, dry	1.24167	up
2-Hexenoic Acid, (E)-	Acid	powerful, fruity, sweet, warm, herbal	1.2413	down
Benzene, 1-methyl-4-(1-methylethenyl)-	Aromatics	phenolic, spicy, styrene, clove, guaiacol	1.24111	down
2(3H)-Furanone, 5-(acetyloxy)dihydro-5-methyl-	Heterocyclic compound	-	1.24092	down
2,6-dihydroxy-Benzoic Acid	Acid	-	1.24062	down
3-Octanone	Ketone	fresh, herbal, lavender, sweet, mushroom	1.24007	down
1,3-Hexadiene, 3-ethyl-2-methyl-	Hydrocarbons	nutty	1.23959	up
2-Propenoic acid, 3-phenyl-, methyl ester, (E)-	Ester	sweet, balsam, strawberry, cherry	1.23913	up
Sesquirosefuran	Heterocyclic compound	-	1.23884	down
Pinocamphone	Terpenoids	spicy	1.23551	up
D-Verbenone	Terpenoids	-	1.23551	up
Hexanoic acid, 3-hexenyl ester, (Z)-	Ester	fruity, green, waxy, pear, winey, tropical, grassy, pineapple	1.2352	up
2-Oxepanone	Ester	-	1.23479	down
(4,4-Dimethyl-2,4,5,6-tetrahydro-1H-inden-2-yl)acetic Acid	Acid	-	1.2338	down
n-Caproic acid vinyl ester	Ester	-	1.23359	up
1-Butanol, 3-methyl-, acetate	Ester	sweet, fruity, banana, green, ripe	1.23337	down
2-Acetylthiazole	Heterocyclic compound	nutty, popcorn, roasted, peanuts, hazelnut	1.23236	up
(3R,3aR,7S,8aS)-3,6,8,8-Tetramethyl-4,7,8,8a-tetrahydro-1H-3a,7-methanoazulen-2(3H)-one	Terpenoids	-	1.23189	down
2-Ethyl-1-dodecanol	Alcohol	-	1.23189	up
Propanoic acid, 2-methyl-, octyl ester	Ester	oily, green, waxy, soapy, clean, fruity, creamy	1.23072	down
2H-Pyran-2-methanol, tetrahydro-	Heterocyclic compound	-	1.22944	down
2-Propenal, 3-phenyl-	Aldehyde	sweet, spicy, aldehydic, aromatic, balsamic, cinnamyl, resinous, honey, powdery	1.2291	up
Styrene	Aromatics	penetrating, balsamic, gasoline	1.22906	up
2-Ethylhexyl acrylate	Ester	-	1.22884	down
Hydroquinone	Phenol	-	1.22815	down
Hydrocinnamic Acid	Acid	sweet, fatty, rose, musk, cinnamon	1.22786	down
Hexanoic acid, methyl ester	Ester	ethereal, fruity, pineapple, apricot, strawberry, tropical, fruit, banana, bacon	1.22695	down
Arecoline	Heterocyclic compound	-	1.22633	up
Isospathulenol	Terpenoids	-	1.22474	down
Butanoic acid, octyl ester	Ester	fresh, waxy, fruity, green, oily, earthy, creamy, natural, jasmin	1.22414	down
Limonene	Terpenoids	citrus, herbal, terpene, camphor	1.22352	up
4-Heptanone, oxime	Amine	-	1.22092	up
Benzoic acid, ethyl ester	Ester	fruity, dry, musty, sweet, wintergreen	1.21952	down
(+)-Diethyl L-tartrate	Ester	mild, fruity, wine, caramellic	1.21768	down
BenzAldehyde, 2-ethyl-	Aldehyde	Nutty, roasted	1.21644	up
Phenol, 4-butyl-	Phenol	-	1.2164	down
1H-Pyrrole-2,5-dione, 3-ethyl-4-methyl-	Heterocyclic compound	-	1.21625	up
Furaneol	Heterocyclic compound	sweet, cotton, candy, caramel, strawberry, sugar	1.2161	down
9-Hexadecenoic acid, methyl ester, (Z)-	Ester	-	1.21607	up
Acetophenone	Ketone	sweet, pungent, hawthorn, mimosa, almond, acacia	1.2151	up
4-Heptenal	Aldehyde	-	1.21361	up
Naphthalene	Aromatics	pungent, dry, tarry	1.21345	down
Bicyclo[5.2.0]nonane, 2-methylene-4,8,8-trimethyl-4-vinyl-	Terpenoids	-	1.21224	down
Bornyl acetate	Terpenoids	woody, pine, herbal, cedar, spice	1.21196	down
p-Tolylacetic Acid	Acid	-	1.21116	down
1-Nonene, 4,6,8-trimethyl-	Hydrocarbons	-	1.21101	up
Butanoic acid, phenylmethyl ester	Ester	fresh, fruity, jasmin, apricot, loganberry	1.20839	down
3-Acetyl-2-oxo-1,3-oxazolidine	Heterocyclic compound	-	1.20764	down
5-Ethylcyclopent-1-enecarboxAldehyde	Aldehyde	-	1.20628	down
2H-Pyran-2-one, tetrahydro-	Heterocyclic compound	ester, fruity, sweet	1.20601	down
Butyramide, 2-cyano-2-ethyl-	Amine	-	1.20589	up
Acetic acid, (propylthio)-, methyl ester	Ester	-	1.1968	up
1-NaphthalenecarboxAldehyde	Aldehyde	-	1.19629	up
3-Hexen-1-ol, (E)-	Alcohol	green, cortex, privet, leafy, floral, petal, oily, earthy	1.19622	up
2,6,10-Dodecatrien-1-ol, 3,7,11-trimethyl-, (Z,E)-	Terpenoids	-	1.19477	up
2,6-Octadien-1-ol, 3,7-dimethyl-	Terpenoids	-	1.19301	down
2-Acetyl-5-methylfuran	Heterocyclic compound	strong, musty, nutty, hay, coconut, coumarin, milky	1.19118	up
1-Hexanol, 2-ethyl-	Alcohol	citrus, fresh, floral, oily, sweet	1.18708	down
Petasitene	Terpenoids	-	1.18621	up
(1S,4S,4aR)-1-Isopropyl-4-methyl-7-methylene-1,2,3,4,4a,5,6,7-octahydronaphthalene	Terpenoids	-	1.18603	down
Humulene	Terpenoids	woody	1.18339	down
5-Hepten-2-one, 6-methyl-	Ketone	herby, green, citrus, musty, lemongrass	1.1831	up
1,5-Heptadien-4-ol, 3,3,6-trimethyl-	Terpenoids	-	1.18286	down
BenzAldehyde, 3-ethyl-	Aldehyde	-	1.1815	up
Benzothiazole	Heterocyclic compound	meaty, vegetative, brown, cooked, beefy, coffee-like	1.18111	up
cis-2-(2-Pentenyl)furan	Heterocyclic compound	-	1.18107	up
2,4-Imidazolidinedione, 1-methyl-	Heterocyclic compound	-	1.18072	down
6-Octen-1-ol, 3,7-dimethyl-, (R)-	Terpenoids	citronella oil, rose, leaf, oily, petal	1.17995	down
Acetic acid, pentyl ester	Ester	fruity, ba	1.17949	down
2,7-Octadiene-1,6-diol, 2,6-dimethyl-, (Z)-	Alcohol	-	1.17936	down
4-Heptanol, 2,6-dimethyl-, acetate	Ester	herbal, rhubarb, floral, lilac, banana	1.17768	down
Dodecanenitrile	Nitrogen compounds	dry, citrus, orange, peel, metallic, spicy	1.17653	up
Bicyclo[3.1.1]heptan-3-one, 2-hydroxy-2,6,6-trimethyl-	Ketone	-	1.17487	down
Nitroguanidine	Nitrogen compounds	-	1.17298	down
7-Octylidenebicyclo[4.1.0]heptane	Terpenoids	-	1.1713	down
Nonanoic Acid	Acid	waxy, dirty, cheese, cultured, dairy	1.16808	down
Carveol	Terpenoids	minty, spearmint, cooling, green, herbal, caraway, spicy	1.16605	up
2,3-Hexanedione	Ketone	dry, sweet, caramel, butter, oily, fatty, creamy, phenolic, fruity	1.16592	up
Dodecane, 5-methyl-	Hydrocarbons	-	1.16496	down
2'-Ethoxyacetophenone	Ketone	-	1.16401	down
Formamide, N-phenyl-	Amine	-	1.16255	up
6-Nonen-1-ol, acetate, (Z)-	Ester	melon, honeydew, cantaloupe, green, tropical, pear, kiwi, metallic	1.15859	down
(E,E)-3,7,11,15-tetramethyl-1,6,10,14-Hexadecatetraen-3-ol	Terpenoids	mild, floral, rose, balsam	1.15777	up
Dodecane, 3-methyl-	Hydrocarbons	-	1.15749	down
3-Hexen-1-ol, acetate, (Z)-	Ester	fresh, green, sweet, fruity, banana, apple, grassy	1.15573	up
1-Nonadecene	Hydrocarbons	-	1.15569	up
Salvial-4(14)-en-1-one	Terpenoids	-	1.15427	up
Butanoic acid, butyl ester	Ester	fruity, banana, pineapple, green, cherry, tropical fruit, ripe fruit, juicy fruit	1.15389	down
2-Butanone, 4-(2,6,6-trimethyl-1-cyclohexen-1-yl)-	Ketone	earthy, woody, mahogany, orris, dry, amber	1.1535	up
3-Octen-2-one, (E)-	Ketone	Herbaceous, mushroom	1.15254	up
1-(1-Adamantyl)-1-phenylethanol	Aromatics	-	1.15126	down
11-Hexadecen-1-ol, acetate, (Z)-	Ester	-	1.1508	up
Benzene, 1,2-dimethoxy-4-(1-propenyl)-	Aromatics	spicy, clove, blossom, cartion, woody	1.15014	up
Apocynin	Ketone	faint, sweet, vanillin	1.1472	down
1,2,4,5-Tetrazin-3-Amine	Heterocyclic compound	-	1.14686	up
Octane, 2,3,3-trimethyl-	Hydrocarbons	-	1.1468	down
Phenol, 5-methyl-2-(1-methylethyl)-, acetate	Terpenoids	-	1.14589	down
3,7,11-Trimethyl-dodeca-2,6,10-trienoic Acid	Acid	-	1.14535	down
(E)-4,8-Dimethylnona-1,3,7-triene	Terpenoids	-	1.14414	down
1(2H)-Naphthalenone, octahydro-4-hydroxy-, trans-	Ketone	-	1.14387	down
1,4-Methano-1H-Cyclopropa[d]pyridazine, 4,4a,5,5a-tetrahydro-6,6-dimethyl-, (1.alpha.,4.alpha.,4a.alpha.,5a.alpha.)-	Heterocyclic compound	-	1.14351	up
Diphenylmethane	Aromatics	sweet, green, oily, geranium, spicy, metallic, plastic, privet, pear	1.14336	down
Bicyclo(3.3.1)non-2-ene	Hydrocarbons	-	1.14299	down
Eicosane	Hydrocarbons	waxy	1.14274	up
1,2-HydrazinedicarboxAldehyde	Aldehyde	-	1.14256	down
6-Nonenal, (E)-	Aldehyde	-	1.13977	down
2-Acetyl-3-ethylpyrazine	Heterocyclic compound	earthy, potato, chip, nutty, popcorn, corn	1.13897	up
Benzoic acid, 1-methylethyl ester	Ester	sweet, fruity, floral, balsamic	1.13853	up
n-Valeric acid cis-3-hexenyl ester	Ester	green, fruity, apple, pear, kiwi, unripe, banana, tropical	1.13803	down
Pentandioic Acid, (p-t-butylphenyl) ester	Acid	-	1.13653	up
Oxirane, heptadecyl-	Heterocyclic compound	-	1.13614	up
4,4'-Bitriazolyl	Heterocyclic compound	-	1.13514	up
Butanoic Acid, 2-methyl-	Acid	pungent, acid, roquefort, cheese	1.13431	down
Hexadecanoic acid, 15-methyl-, methyl ester	Ester	-	1.13411	up
5-Heptenal, 2,6-dimethyl-	Aldehyde	fresh, ozone, melon, fresh air, sweet, green	1.13213	up
Cyclohexanecarboxylic Acid	Acid	fruity, acidic, metallic, cheese, tropical	1.13154	down
AcetAldehyde, (3,3-dimethylcyclohexylidene)-, (Z)-	Aldehyde	-	1.13015	up
9H-Pyrido[3,4-b]indole, 1-methyl-	Heterocyclic compound	-	1.12941	up
1,6-Octadien-3-ol, 3,7-dimethyl-, formate	Ester	citrus, herbal, bergamot, lavender, soapy, fatty, green, woody	1.12798	up
4-Hexen-3-one	Ketone	pungent, ethereal, spicy, green, tropical, metallic	1.12498	up
2,4-Decadien-1-ol	Alcohol	fatty, waxy, citrus, melon	1.12489	up
3,4-Dimethoxytoluene	Aromatics	-	1.12278	up
Hexadecanoic acid, ethyl ester	Ester	mild, waxy, fruity, creamy, milky, balsamic, greasy, oily	1.12128	up
2,6-Octadiene, 2,6-dimethyl-	Hydrocarbons	-	1.1208	down
5-Isoxazolecarboxylic acid, 4,5-dihydro-5-methyl-, methyl ester, (R)-	Heterocyclic compound	-	1.12077	up
Hexanoic Acid	Acid	roses, geraniumc, Cheese, fat	1.1193	down
Ethanone, 1-(2-thienyl)-	Heterocyclic compound	sulfurous, nutty, hazelnut, walnut	1.11779	up
Naphthalene, decahydro-1,1,4a-trimethyl-6-methylene-5-(3-methylene-4-pentenyl)-, [4aS-(4a.alpha.,5.alpha.,8a.beta.)]-	Terpenoids	powerful, green, terpenic, woody, amber, clary, sage	1.11717	up
Undecane, 3,5-dimethyl-	Hydrocarbons	-	1.11577	up
Dodecane, 2,6,10-trimethyl-	Hydrocarbons	-	1.11564	down
2-Dimethylamino-4-methyl-pent-4-enenitrile	Amine	-	1.11354	down
1,5-Heptadien-4-one, 3,3,6-trimethyl-	Terpenoids	herbal, honey, mint, berry	1.11265	down
Prilocaine	Amine	-	1.11194	down
Hexanedioic Acid	Acid	-	1.11146	down
4-Heptenal, (Z)-	Aldehyde	oily, fatty, green, dairy, milky, creamy	1.11059	up
CyclohexanecarboxAldehyde	Aldehyde	-	1.1066	down
Octane, 2,6,6-trimethyl-	Hydrocarbons	-	1.09837	down
trans-2-Dodecen-1-ol	Alcohol	oily, fatty	1.09818	up
Naphthalene, 1,2,4a,5,8,8a-hexahydro-4,7-dimethyl-1-(1-methylethyl)-, [1S-(1.alpha.,4a.beta.,8a.alpha.)]-	Terpenoids	green, woody	1.09745	up
1-Pentanol	Alcohol	plastic, moderately strong, green, fusel oil-like	1.09515	up
.beta.-Pinene	Terpenoids	dry, woody, resinous, pine, hay, green	1.08632	up
Butanoic acid, 3-hexenyl ester, (Z)-	Ester	fresh, green, apple, fruity, wine, metallic, buttery	1.07759	up
2-Hepten-1-ol, (E)-	Alcohol	pungent, fatty, plastic, green	1.07487	up
Decane	Hydrocarbons	alkane	1.06459	down
Bicyclo[7.2.0]undec-4-ene, 4,11,11-trimethyl-8-methylene-,[1R-(1R*,4Z,9S*)]-	Terpenoids	woody, spicy	1.06388	up
Cyclohexanol	Alcohol	camphor, menthol, phenol	1.06101	down
3-Hexanone, 1-phenyl-	Ketone	-	1.06023	up
2,4-Nonadienal, (E,E)-	Aldehyde	fatty, melon, waxy, green, violet, leaf, cucumber, tropical, fruit, chicken, fat	1.059	up
1,2-Benzenedicarboxylic acid, bis(2-methylpropyl) ester	Ester	-	1.05824	down
3-Octen-1-ol, (Z)-	Alcohol	fresh, fatty, greasy, melon, green, cortex, herbal, earthy, fusel, spicy	1.05823	up
(Z)-Oxacyclopentadec-6-en-2-one	Ketone	-	1.05555	up
Benzeneacetic acid, ethyl ester	Ester	mint	1.04681	down
2-methyl-5-propan-2-ylcyclohexa-2,5-diene-1,4-dione	Ketone	-	1.0357	down
Ascaridole	Terpenoids	-	1.03517	down
2-Ethoxy-3-methylpyrazine	Heterocyclic compound	hazelnut, roasted, almonds, pineapple, earthy	1.03363	down
7-Oxabicyclo[4.1.0]heptan-2-one, 6-methyl-3-(1-methylethyl)-	Ketone	-	1.03134	down
Nonane, 1-iodo-	Halogenated hydrocarbons	-	1.03084	down
1,2,3-trimethoxy-5-(2-propenyl)-Benzene	Aromatics	spice, flower	1.03076	down
Benzenemethanol, .alpha.-2-cyclohexen-1-yl-	Alcohol	-	1.02666	up
Naphthalene, 1,6-dimethyl-	Aromatics	-	1.02666	up
Furan, 2-[(methyldithio)methyl]-	Sulfur compounds	sulfury, coffee, roasted, alliaceous, meaty	1.02293	up
(E)-2-Octenal	Aldehyde	fresh, cucumber, fatty, green, herbal, banana, waxy, green, leaf	1.01872	up
2-Oxabicyclo[2.2.2]octan-6-one, 1,3,3-trimethyl-	Terpenoids	-	1.01422	up
4-Penten-1-ol, propanoate	Ester	-	1.01026	down
2-Pentadecanone	Ketone	fresh, jasmin, celery	1.00511	up
Phenol, m-tert-butyl-	Phenol	-	1.00376	down
Octadecane	Hydrocarbons	alkane	1.00346	up
4-Hexen-3-one, 5-methyl-	Ketone	-	0.985432	insig
(1S,5S,6R)-6-Methyl-2-methylene-6-(4-methylpent-3-en-1-yl)bicyclo[3.1.1]heptane	Terpenoids	-	0.984764	insig
2,5-Furandione, dihydro-3-methyl-	Heterocyclic compound	-	0.982204	insig
(1S,2E,6E,10R)-3,7,11,11-Tetramethylbicyclo[8.1.0]undeca-2,6-diene	Terpenoids	green, woody, weedy	0.980285	insig
[1S-(1.alpha.,7.alpha.,8a.beta.)]-1,2,3,5,6,7,8,8a-octahydro-1,4-dimethyl-7-(1-methylethenyl)-Azulene	Terpenoids	-	0.979817	insig
2,5-Octanedione	Ketone	-	0.97973	insig
8-Azabicyclo[3.2.1]octane, 3-chloro-8-methyl-	Heterocyclic compound	-	0.978143	insig
Naphthalene, 1-methyl-	Aromatics	naphthyl, chemical, medicil, camphor	0.97632	insig
Acetic acid, octyl ester	Ester	green, earthy, mushroom, herbal, waxy	0.973221	insig
2-Cyclopentylethanol	Alcohol	-	0.969878	insig
Butanoic acid, 1,1-dimethyl-2-phenylethyl ester	Ester	floral, green, herbal, fruity, plum, prune	0.965038	insig
(E)-Hexadec-2-enal	Aldehyde	-	0.964366	insig
Pentanoic Acid, 2-methyl-	Acid	-	0.963845	insig
Bicyclo[3.1.0]hexan-3-ol, 4-methylene-1-(1-methylethyl)-, acetate	Terpenoids	-	0.960314	insig
Piperidine	Heterocyclic compound	heavy, sweet, floral, animal	0.959681	insig
Pyridine, 2-hexyl-	Heterocyclic compound	green, fatty, mutton	0.954146	insig
1,2-Octanediol	Alcohol	-	0.942845	insig
Dodecane	Hydrocarbons	alkane	0.940707	insig
Cyclohexanone, 2-(1-mercapto-1-methylethyl)-5-methyl-, (2S-trans)-	Ketone	-	0.940627	insig
Tropinone	Heterocyclic compound	-	0.937569	insig
Heptanal	Aldehyde	fresh, aldehydic, fatty, green, herbal, wine-lee, ozone	0.933443	insig
Pyrazine, 2-ethyl-5-methyl-	Heterocyclic compound	coffee, bean, nutty, grassy, roasted	0.93218	insig
Cyclohexanol, 3-ethenyl-3-methyl-2-(1-methylethenyl)-6-(1-methylethyl)-, [1R-(1.alpha.,2.alpha.,3.beta.,6.alpha.)]-	Terpenoids	-	0.930945	insig
2-Undecenal, E-	Aldehyde	fresh, fruity, citrus, orange, peel	0.928844	insig
Caryophyllene oxide	Terpenoids	sweet, fresh, dry, woody, spicy	0.923521	insig
3-Hexen-1-ol, acetate, (E)-	Ester	sharp, fruity, green, cortex, hyacinth, narcissus, rummy, unripe, banana, pear	0.919145	insig
BenzenAmine, 4-ethoxy-	Amine	-	0.916096	insig
.beta.-Guaiene	Terpenoids	sweet, woody, dry, guaiacwood, spicy, powdery	0.909797	insig
Carbonic acid, phenyl propyl ester	Ester	-	0.907464	insig
1,2-Cyclohexanedione	Ketone	sweet, acorn, nut, skin, maple, caramel, brothy	0.906537	insig
BenzAldehyde, 3,4-dimethoxy-	Aldehyde	sweet, woody, vanilla	0.905656	insig
Aminopyrine	Heterocyclic compound	-	0.898666	insig
Naphthalene, 1,4-dimethyl-	Aromatics	-	0.89577	insig
(5-bromopentyl)-Benzene	Aromatics	-	0.893081	insig
1,5-Cycloundecadiene, 8,8-dimethyl-9-methylene-	Hydrocarbons	-	0.891696	insig
1-Hexadecanol	Alcohol	waxy, clean, greasy, floral, oily	0.88614	insig
(2E,4S,7E)-4-Isopropyl-1,7-dimethylcyclodeca-2,7-dienol	Alcohol	-	0.884892	insig
Furfuryl hexanoate	Ester	green, fatty, musty, waxy	0.882527	insig
Pentadecanoic acid, methyl ester	Ester	-	0.882324	insig
(Z)-Cinnamyl benzoate	Ester	-	0.874182	insig
1,3-Cyclohexadiene, 5-(1,5-dimethyl-4-hexenyl)-2-methyl-, [S-(R*,S*)]-	Terpenoids	spice, fresh, sharp	0.872729	insig
1-Nonen-4-ol	Alcohol	-	0.872495	insig
1-Butanol, 3-methyl-, formate	Ester	plum, black, currant, ethereal, vinous, dry, earthy, fruit, green	0.871578	insig
Thiophene, 2-dodecyl-	Heterocyclic compound	-	0.871531	insig
Isopinocarveol	Terpenoids	woody, warm, balsam	0.869319	insig
.alpha.-Muurolene	Terpenoids	woody	0.869029	insig
Fenchyl acetate	Ester	fresh, sweet, pine, fir, herbal, citrus	0.868713	insig
Naphthalene, decahydro-4a-methyl-1-methylene-7-(1-methylethenyl)-, [4aR-(4a.alpha.,7.alpha.,8a.beta.)]-	Terpenoids	herbal	0.868066	insig
Thiophene, 2-hexyl-	Heterocyclic compound	floral, fruity, gassy, green, meaty	0.866927	insig
2-Methylbutanoic anhydride	Others	-	0.860244	insig
spiro[3-oxatricyclo[3.3.1.02,4]nonane-8,1'-cyclopropane]-6-one	Ketone	-	0.855843	insig
trans-.alpha.-Bergamotene	Terpenoids	woody, warm, tea	0.852467	insig
Butanoic acid, 2-methyl-, 2-methylbutyl ester	Ester	sweet, fruity, ester, berry, green, waxy, apple	0.841142	insig
2-Undecanone	Ketone	waxy, fruity, creamy, fatty, orris, floral	0.839162	insig
cis-Dihydrocarvone	Terpenoids	herbal, warm	0.830995	insig
3(2H)-Furanone, dihydro-2-methyl-	Heterocyclic compound	sweet, solvent, bread, buttery, nutty	0.82893	insig
Heptanoic acid, ethyl ester	Ester	fruity, pineapple, cognac, rum, wine	0.828199	insig
Undecylenic Acid	Acid	sweet, woody	0.815939	insig
Tetradecane	Hydrocarbons	mild, waxy	0.815194	insig
Ethanone, 1-(2-methyl-1-cyclopenten-1-yl)-	Ketone	-	0.812305	insig
1,3-Cyclohexadiene, 1-methyl-4-(1-methylethyl)-	Terpenoids	woody, terpene, lemon, herbal, medicil, citrus	0.812008	insig
(E)-2-Methylbut-2-en-1-yl methacrylate	Ester	-	0.809133	insig
Butanoic acid, 5-hexenyl ester	Ester	-	0.807086	insig
4-Isopropylcyclohexa-1,3-dienecarbAldehyde	Aldehyde	fatty, spicy	0.80648	insig
1-Octyl trifluoroacetate	Ester	-	0.80482	insig
.beta.-Acorenol	Terpenoids	-	0.803894	insig
Cyclohexanone, 2,2,6-trimethyl-	Ketone	pungent, thujone, labdanum, honey, cistus	0.800093	insig
2-Nonanol	Alcohol	rose	0.796614	insig
4-Decenal, (E)-	Aldehyde	fresh, aldehydic, citrus, orange, mandarin, tangerine, green, fatty	0.795497	insig
Furan, 2-butyltetrahydro-	Heterocyclic compound	-	0.793971	insig
.beta.-Myrcene	Terpenoids	musty, balsamic, spice	0.790545	insig
Tetradecane, 2,6,10-trimethyl-	Hydrocarbons	-	0.780979	insig
6-Methyl-6-(5-methylfuran-2-yl)heptan-2-one	Ketone	-	0.779426	insig
BenzAldehyde, 3-hydroxy-	Aldehyde	-	0.773934	insig
BenzeneethanAmine, N,.alpha.,.alpha.-trimethyl-	Amine	-	0.769471	insig
(2S,3S,6S)-6-Isopropyl-3-methyl-2-(prop-1-en-2-yl)-3-vinylcyclohexanone	Terpenoids	-	0.769254	insig
Dodecanoic acid, methyl ester	Ester	waxy, soapy, creamy, coconut, mushroom	0.769076	insig
Imidodicarbonic diamide	Nitrogen compounds	-	0.768035	insig
Hexanedioic acid, dimethyl ester	Ester	mild, nutty	0.767521	insig
1-Tridecene	Hydrocarbons	-	0.764879	insig
Hexadecanoic acid, methyl ester	Ester	oily, waxy, fatty, orris	0.763839	insig
Acetic acid, hexyl ester	Ester	fruity, green, apple, banana, sweet	0.762944	insig
(2E,4Z)-2,4-Decadienal	Aldehyde	fried, fatty, geranium, green, waxy	0.761692	insig
(5R,10R)-10-Methyl-6-methylene-2-(propan-2-ylidene)spiro[4.5]dec-7-ene	Terpenoids	-	0.75687	insig
9,10-Anthracenedione, 1-hydroxy-	Phenol	-	0.755396	insig
2,4-Decadienal, (E,E)-	Aldehyde	dusty, waxy, oily, soapy	0.754749	insig
1H-Pyrrole-3-carbonitrile	Heterocyclic compound	-	0.753196	insig
Cyclohexanol, 1-methyl-4-(1-methylethylidene)-	Terpenoids	terpineol, lilac	0.752412	insig
3-Penten-2-one, 4-(acetyloxy)-, (Z)-	Ketone	-	0.750741	insig
Methyl tetradecanoate	Ester	fatty, waxy, petal	0.750204	insig
1-ethenyl-2-Pyrrolidinone	Heterocyclic compound	-	0.745811	insig
Pentyl octanoate	Ester	orris, sweet, winey, cognac, elderflower, fatty	0.740782	insig
L-Proline, 1-acetyl-	Acid	-	0.739112	insig
Citronellyl isobutyrate	Ester	sweet, fruity, floral, geranium, tropical	0.736638	insig
2H-1-Benzopyran-2-one, 3-methyl-	Heterocyclic compound	-	0.736142	insig
3-Hexene, 1-(1-methoxyethoxy)-, (Z)-	Hydrocarbons	-	0.735494	insig
1-Cyclohexene-1-carboxAldehyde, 4-(1-methylethenyl)-, (S)-	Aldehyde	fresh, green, oily, grassy, fatty, mint, cherry	0.732069	insig
Diethylpropion	Amine	-	0.730791	insig
4-Phenyl-2-butanol	Alcohol	floral, peony, foliage, sweet, mimosa, heliotrope	0.730351	insig
1H-Pyrazole, 1,3,5-trimethyl-	Heterocyclic compound	-	0.727828	insig
(2S,6R,7S,8E)-(+)-2,7-Epoxy-4,8-megastigmadiene	Hydrocarbons	-	0.727343	insig
2-Methyl-1,3-dithiacyclopentane	Heterocyclic compound	sulfurous, alliaceous, smoky, savory, vegetable	0.722683	insig
6-Octen-1-ol, 7-methyl-3-methylene-	Terpenoids	-	0.722396	insig
Palmitoleic Acid	Acid	-	0.720858	insig
Benzene, 1,2,4-trimethyl-	Aromatics	plastic	0.718403	insig
Benzene, n-butyl-	Aromatics	-	0.718237	insig
1-(2-Hydroxyethyl)-1,2,4-triazole	Heterocyclic compound	-	0.714436	insig
Undecane, 4,6-dimethyl-	Hydrocarbons	-	0.712697	insig
Pentadecane, 4-methyl-	Hydrocarbons	-	0.705745	insig
Valproic Acid	Acid	-	0.705203	insig
Furan, 3-(4-methyl-3-pentenyl)-	Terpenoids	woody	0.704704	insig
9-Oxononanoic Acid	Acid	-	0.701682	insig
2-Isopropyl-5-methylhex-2-enal	Aldehyde	herbal, lavender, woody, green, blueberry, tomato	0.700702	insig
Benzene, 1,2,3-trimethyl-	Aromatics	-	0.700217	insig
2H-Indol-2-one, 1,3-dihydro-	Heterocyclic compound	-	0.694478	insig
Heneicosane	Hydrocarbons	waxy	0.692492	insig
Undecane, 3,4-dimethyl-	Hydrocarbons	-	0.690019	insig
Octadecane, 1-chloro-	Halogenated hydrocarbons	-	0.687604	insig
Undecane, 2,5-dimethyl-	Hydrocarbons	-	0.685024	insig
Isopentyl hexanoate	Ester	fruity, banana, apple, pineapple, green	0.677234	insig
p-Cresol	Phenol	phenolic, narcissus, animal, mimosa	0.674983	insig
5-Cyclohexadecen-1-one	Ketone	dry, powdery, musk, amber, civet	0.669669	insig
Benzenemethanol, .alpha.-2-propenyl-	Alcohol	-	0.668466	insig
Cyclohexanol, 2-methyl-3-(1-methylethenyl)-, (1.alpha.,2.alpha.,3.alpha.)-	Alcohol	-	0.667848	insig
3-Cyclopentyl-1-propanol	Alcohol	-	0.666862	insig
2H-Pyran-2-one, tetrahydro-6-propyl-	Heterocyclic compound	coconut	0.666275	insig
Eremophilene	Terpenoids	-	0.664137	insig
.delta.-Nonalactone	Ester	coconut, creamy, sweet, milky, coumarin	0.660732	insig
Hygrine	Heterocyclic compound	-	0.651175	insig
1,3-Cyclopentanedione, 2-acetyl-4-methyl-	Ketone	-	0.646696	insig
BenzAldehyde, 4-methoxy-	Aldehyde	sweet, powdery, mimosa, floral, hawthorn, balsam	0.645615	insig
Pyrazinamide	Heterocyclic compound	-	0.645099	insig
Phenol, 3-methyl-	Phenol	smoky, petroleum-like	0.64106	insig
Hexanoic acid, 2-methylpropyl ester	Ester	fruity, pineapple, green, apple, skin, green, apple, sour, tropical, peach, earthy	0.636484	insig
Cyclopentanone, 2-(2-hexenyl)-	Ketone	oily, jasmin, coconut, milky, dairy, floral	0.635315	insig
Heptane, 2,4-dimethyl-	Hydrocarbons	-	0.635007	insig
dl-Camphoroquinone	Terpenoids	-	0.629613	insig
Mexiletine	Amine	-	0.624079	insig
2-Hexanol, (R)-	Alcohol	mushroom, dusty, oily	0.621891	insig
1-Hexanol, 4-methyl-	Alcohol	sweaty	0.617789	insig
1-Undecanol	Alcohol	fresh, waxy, rose, soapy, clean, clothes, floral, citrus	0.613951	insig
Propanoic acid, 2-methyl-, heptyl ester	Ester	sweet, green, fruity, warm, floral, apple, cherry, apricot	0.612918	insig
Ethanone, 1-(2-methylphenyl)-	Ketone	sweet, hawthorn, powdery, anisic, coumarinic, phenolic, burnt, nutty, honey	0.609953	insig
(2,2,6-Trimethyl-bicyclo[4.1.0]hept-1-yl)-methanol	Alcohol	-	0.609693	insig
2-Hexanoylfuran	Heterocyclic compound	sweet, fruity, ketone, green, apricot, peach	0.607753	insig
1-Propanone, 1-cyclopropyl-	Ketone	-	0.607743	insig
o-Xylene	Aromatics	geranium	0.606351	insig
Carvone	Terpenoids	minty, licorice	0.600246	insig
4-tert-Butylcyclohexyl acetate	Ester	woody, cedar, floral, oily, herbal, balsam, green, fruity	0.590867	insig
2-Decenal, (Z)-	Aldehyde	tallow	0.59013	insig
Butanoic acid, heptyl ester	Ester	-	0.583424	insig
3-Buten-2-one, 4-(2,2,6-trimethyl-7-oxabicyclo[4.1.0]hept-1-yl)-	Terpenoids	fruity, sweet, berry, woody, violet, orris, powdery	0.581285	insig
2(5H)-Furanone, 5-ethyl-3-hydroxy-4-methyl-	Heterocyclic compound	sweet, fruity, caramellic, maple, fenugreek, brown, sugar, nutty, chicory, praline, butterscotch	0.579968	insig
Acetic acid, cyclohexyl ester	Ester	fruity, sweet, musty, ethereal	0.575175	insig
Linalyl acetate	Terpenoids	sweet, green, citrus, bergamot, lavender, woody	0.570576	insig
3-Cyclohexene-1-ethanol, .beta.,4-dimethyl-	Alcohol	fruity, herbal	0.567454	insig
3-Methyl-1-(3-methyl-2-furyl)-1-butanone	Heterocyclic compound	-	0.564179	insig
Cyclohexane, 1-methylene-4-(1-methylethenyl)-	Terpenoids	-	0.560642	insig
1H-Pyrrole-2,5-dione	Heterocyclic compound	-	0.556455	insig
p-Cymene	Aromatics	wood-like, citrus-like	0.553303	insig
Propanoic acid, 2-methyl-, 3-hydroxy-2,2,4-trimethylpentyl ester	Ester	-	0.551446	insig
Isophorone	Ketone	cooling, woody, sweet, green, camphor, fruity, musty, cedarwood, tobacco, leather	0.550114	insig
Butanoic acid, 2-pentenyl ester, (Z)-	Ester	-	0.54685	insig
Propanoic acid, 2-methyl-, 2-methylbutyl ester	Ester	fruity, ethereal, tropical, banana	0.544747	insig
2H-Pyran-2-one, 6-hexyltetrahydro-	Ester	creamy, fatty, coconut, fruity, peach, waxy	0.543895	insig
Bicyclo[3.1.1]hept-2-ene-2-carboxaldehyde, 6,6-dimethyl-	Terpenoids	sweet, cinnamon, tonka, spicy, terpene, camphor, jam	0.518879	insig
Citral	Terpenoids	sharp, lemon, sweet	0.517255	insig
2-methoxy-Phenol	Phenol	nutty	0.513261	insig
2H-Pyran-2-one, tetrahydro-6-methyl-	Heterocyclic compound	Creamy, fruity, coconut	0.503761	insig
Butanoic acid, 3-hexenyl ester, (E)-	Ester	-	0.501891	insig
2-Butenoic acid, 2-methyl-, 2-methylpropyl ester, (E)-	Ester	herbal, pungent	0.500204	insig
Benzene, 1,3-dimethyl-	Aromatics	plastic	0.497451	insig
Heptadecane, 2-methyl-	Hydrocarbons	-	0.489973	insig
Bicyclo[3.1.1]hept-2-ene-2-methanol, 6,6-dimethyl-	Terpenoids	woody, minty	0.48583	insig
L-.alpha.-Terpineol	Terpenoids	lilac, floral, terpenic	0.485733	insig
2,6-Dimethyl-1-nonen-3-yn-5-ol	Alcohol	-	0.484229	insig
Benzene, (methylthio)-	Sulfur compounds	toluene, solvent, spicy, woody, sawdust	0.480193	insig
Heptane	Hydrocarbons	sweet, ethereal	0.479091	insig
Furo[3,4-c]pyridin-1(3H)-one, 7-hydroxy-6-methyl-	Heterocyclic compound	-	0.474426	insig
Pyrazine	Heterocyclic compound	pungent, sweet, corn, roasted, hazelnut, barly	0.466906	insig
1-Isopropyl-4,7-dimethyl-1,2,3,5,6,8a-hexahydronaphthalene	Terpenoids	-	0.464499	insig
1-Hexanol, 5-methyl-2-(1-methylethyl)-, acetate	Ester	-	0.463316	insig
2-Oxetanone, 4-methyl-	Ketone	-	0.462283	insig
Cyclobutanone, 2,2,3-trimethyl-	Ketone	-	0.462215	insig
4,5-Dihydro-3-furoic Acid	Acid	-	0.454926	insig
2-Methyl-2,5-divinyltetrahydrofuran	Heterocyclic compound	-	0.450272	insig
Geranyl acetate	Terpenoids	lime-like	0.448667	insig
Benzene, 2-ethyl-1,4-dimethyl-	Aromatics	-	0.44292	insig
Phenol, 4-methyl-2-nitro-	Phenol	-	0.442691	insig
7-Octen-4-ol, 2-methyl-6-methylene-, (S)-	Terpenoids	-	0.440051	insig
Decane, 2,4-dimethyl-	Hydrocarbons	-	0.437953	insig
Hexadecane	Hydrocarbons	alkane	0.432986	insig
2(1H)-Pyridinone	Heterocyclic compound	-	0.429914	insig
1H-Pyrrolizine-7-methanol, 2,3,5,7a-tetrahydro-1-hydroxy-, (1S-cis)-	Heterocyclic compound	-	0.421599	insig
3-Butylthiophene	Heterocyclic compound	-	0.420501	insig
3-Oxatricyclo[4.1.1.0(2,4)]octane, 2,7,7-trimethyl-	Terpenoids	green	0.417414	insig
Dicyclohexyldisulphide	Sulfur compounds	alliaceous, onion, egg, nut, skin, coffee, clam, crab	0.41729	insig
1-Dodecanol	Alcohol	earthy, soapy, waxy, fatty, honey, coconut	0.417203	insig
1,10-Undecadiene	Hydrocarbons	-	0.410013	insig
Ethanone, 1-(2-furanyl)-	Heterocyclic compound	nut-like, sweet, roast	0.400653	insig
Dibutyl phthalate	Ester	faint	0.399194	insig
3-Methylpenta-1,3-diene-5-ol, (E)-	Alcohol	-	0.397565	insig
Nonane, 2,6-dimethyl-	Hydrocarbons	-	0.397499	insig
Benzene, nitro-	Aromatics	-	0.393154	insig
Butanoic Acid, 3-methylbutyl ester	Ester	fruity, green, apricot, pear, banana	0.39136	insig
3-Cyclohexene-1-methanethiol, .alpha.,.alpha.,4-trimethyl-	Sulfur compounds	sulfury, aromatic, grapefruit, naphthyl, resinous, woody	0.387906	insig
Ethanone, 1-(1H-pyrrol-2-yl)-	Heterocyclic compound	musty, nut, skin, maraschino, cherry, coumarinic, licorice, walnut, bready	0.382127	insig
3H-3a,7-Methanoazulene, 2,4,5,6,7,8-hexahydro-1,4,9,9-tetramethyl-, [3aR-(3a.alpha.,4.beta.,7.alpha.)]-	Terpenoids	-	0.376933	insig
4-Decenoic acid, methyl ester, Z-	Ester	fruity, pear, mango, fishy, peach, skin, green	0.376076	insig
1,3,6-Octatriene, 3,7-dimethyl-, (Z)-	Terpenoids	warm, floral, herb, flower, sweet	0.372617	insig
(2S,4R)-4-Methyl-2-(2-methylprop-1-en-1-yl)tetrahydro-2H-pyran	Terpenoids	rose, cortex, green, floral, geranium, powdery, metallic	0.370931	insig
Cyclohexene, 4-methyl-1-(1-methylethenyl)-	Hydrocarbons	-	0.369174	insig
5-Methyl-(E)-2-hepten-4-one	Ketone	hazelnut, nutty	0.366971	insig
Dodecane, 4,6-dimethyl-	Hydrocarbons	-	0.366832	insig
2,6-Piperidinedione, 3-ethyl-	Heterocyclic compound	-	0.36607	insig
1H-Imidazole, 2-propyl-	Heterocyclic compound	-	0.364524	insig
1H-Cycloprop[e]azulene, decahydro-1,1,4,7-tetramethyl-, [1aR-(1a.alpha.,4.beta.,4a.beta.,7.beta.,7a.beta.,7b.alpha.)]-	Terpenoids	-	0.363288	insig
Cyclohexanol, 2,6-dimethyl-	Alcohol	-	0.359322	insig
1H-Pyrazole-1-carboximidamide, 3,5-dimethyl-	Heterocyclic compound	-	0.358013	insig
Benzene, 1-methyl-4-(1,2,2-trimethylcyclopentyl)-, (R)-	Terpenoids	-	0.357826	insig
Benzene, 1-ethyl-3-methyl-	Aromatics	-	0.356166	insig
BenzAldehyde	Aldehyde	sweet, bitter, almond, cherry	0.355851	insig
Palustrol (Ledum)	Terpenoids	-	0.351013	insig
Nonanoic acid, ethyl ester	Ester	fruity, rose, waxy, rum, wine, natural, tropical	0.34802	insig
2-Propenoic acid, pentyl ester	Ester	-	0.340476	insig
Cyclohexanol, 3,5-dimethyl-	Alcohol	-	0.339201	insig
1-Dodecene	Hydrocarbons	-	0.331644	insig
Benzene, 1,2,4,5-tetramethyl-	Aromatics	rancid, sweet	0.329005	insig
Thujone	Terpenoids	cedarleaf, thujonic	0.325851	insig
2,6,6-Trimethyl-2-cyclohexene-1,4-dione	Ketone	musty, woody, sweet, tea, tobacco, leaf	0.325243	insig
2-Piperidinimine	Heterocyclic compound	-	0.324553	insig
2-Penten-1-ol, (Z)-	Alcohol	green, phenolic, nasturtium, ethereal, medicil, aldehydic, cherry, narcissus, metallic, fruity	0.323711	insig
Hexanoic acid, 2-methylbutyl ester	Ester	ethereal	0.321207	insig
Bicyclo[2.2.1]heptane-2,5-dione, 1,7,7-trimethyl-	Terpenoids	-	0.320871	insig
Undecanoic acid, ethyl ester	Ester	soapy, waxy, fatty, cognac, coconut	0.32053	insig
2-Nonenenitrile	Nitrogen compounds	green, fatty, orris	0.318857	insig
10-Undecenal	Aldehyde	waxy, aldehydic, rose, mandarin, citrus, soapy, fatty	0.316356	insig
Benzenepropanoic Acid, 4-hydroxy-	Acid	-	0.3082	insig
Benzene, 1-ethyl-3,5-dimethyl-	Aromatics	-	0.306556	insig
trans-.beta.-Ocimene	Terpenoids	sweet, herbal	0.301305	insig
Bicyclo[3.1.1]heptan-3-ol, 2,6,6-trimethyl-, (1.alpha.,2.beta.,3.alpha.,5.alpha.)-	Terpenoids	-	0.292284	insig
Nonane	Hydrocarbons	linseed, oil, oily, sweaty	0.291685	insig
Fenchone	Terpenoids	herbal, cedarleaf, bitter, thuja, camphor, earthy, woody	0.287102	insig
Acetonitrile, 2,2'-iminobis-	Nitrogen compounds	-	0.285141	insig
3-Hexanone-2,2,4,4-d4	Ketone	-	0.27533	insig
2,4-Decadienoic acid, ethyl ester, (E,Z)-	Ester	green, waxy, pear, apple, sweet, fruity, tropical	0.272667	insig
2-(3-Thienyl)pyridine	Heterocyclic compound	-	0.271863	insig
1-iodo-Decane	Halogenated hydrocarbons	-	0.265313	insig
Hexanoic acid, cyclopentyl ester	Ester	-	0.263667	insig
3,5-Dimethyldodecane	Hydrocarbons	-	0.261276	insig
2,6-Octadien-1-ol, 3,7-dimethyl-, acetate, (Z)-	Ester	floral, rose, soapy, citrus, dewy, pear	0.257083	insig
Hordenine	Amine	-	0.256365	insig
Cyclohexene, 1-methoxy-	Aromatics	herb, spice	0.255879	insig
2,6,10-Dodecatrienal, 3,7,11-trimethyl-	Terpenoids	floral, minty	0.248704	insig
p-Tolyl isobutyrate	Ester	aromatic, fruity, phenolicnote	0.248042	insig
Tridecane	Hydrocarbons	alkane	0.234613	insig
3H-1,2,4-Triazol-3-one, 1,2-dihydro-	Heterocyclic compound	-	0.234504	insig
Furan, 3-(4,8-dimethyl-3,7-nonadienyl)-, (E)-	Terpenoids	-	0.234157	insig
Benzenepropanol, 4-hydroxy-3-methoxy-	Alcohol	-	0.233186	insig
Nonane, 2,5-dimethyl-	Hydrocarbons	-	0.231423	insig
2,3-Dimethyl-3-heptene, (Z)-	Hydrocarbons	-	0.206545	insig
3-Cyclohexen-1-one, 3,5,5-trimethyl-	Ketone	-	0.202315	insig
Dodecane, 5,8-diethyl-	Hydrocarbons	-	0.194882	insig
BenzeneacetAldehyde, 4-methyl-	Aldehyde	fresh, sweet, green, cortex, lilac, narcissus	0.186447	insig
BenzenAmine, N,N-dimethyl-	Amine	-	0.173312	insig
2,6-Dimethyl-2-trans-6-octadiene	Terpenoids	-	0.172222	insig
2-Cyclohexen-1-one, 2-hydroxy-3-methyl-6-(1-methylethyl)-	Terpenoids	minty, buchu, leaves, black currant, bud, phenolic, cornmint, mentholic, herbal, woody	0.17039	insig
(E)-2-Decenal	Aldehyde	waxy, fatty, earthy, green, cilantro, mushroom, aldehydic, fried, chicken, fat, tallow	0.163206	insig
Benzoic Acid, 4-methoxy-	Acid	faint, putrid, sweet, cadaverous	0.161921	insig
1,8,11,14-Heptadecatetraene, (Z,Z,Z)-	Hydrocarbons	costus	0.14665	insig
3-Acetyl-2,5-dimethyl furan	Heterocyclic compound	sweet, musty, nutty, earthy, cocoa, corn, leather	0.13353	insig
cis-9-Tetradecen-1-ol	Alcohol	-	0.12171	insig
2-Cyclopenten-1-one, 2-pentyl-	Ketone	woody, isojasmone, jasmin, tuberose	0.119635	insig
2-Azabicyclo[3.2.1]octan-3-one	Ketone	-	0.119184	insig
Pyrazine, ethyl-	Heterocyclic compound	peanut, butter, musty, nutty, woody, roasted, cocoa	0.117256	insig
2H-Pyran-2-one, tetrahydro-6-pentyl-	Ester	creamy, coconut, fruity	0.110823	insig
Lavandulyl caproate	Ester	-	0.109042	insig
Cyclobuta[1,2:3,4]dicyclooctene, 1,2,5,6,6a,6b,7,8,11,12,12a,12b-dodecahydro-, (6a.alpha.,6b.beta.,12a.alpha.,12b.beta.)-	Hydrocarbons	-	0.0992405	insig
Pyridine, 2,3,4,5-tetrahydro-6-propyl-	Heterocyclic compound	-	0.0959366	insig
Bicyclo[7.2.0]undecane, 10,10-dimethyl-2,6-bis(methylene)-, [1S-(1R*,9S*)]-	Terpenoids	-	0.0945999	insig
3-Hexene, 1-(1-ethoxyethoxy)-, (Z)-	Aldehyde	green, violet, natural, green, leaf, mushroom, earthy	0.0928713	insig
3-Acetyl-1H-pyrroline	Heterocyclic compound	Roast	0.0895802	insig
Tridecane, 4,8-dimethyl-	Hydrocarbons	-	0.0858419	insig
Undecane	Hydrocarbons	alkane	0.0824723	insig
D-Limonene	Terpenoids	citrus-like	0.0770552	insig
Butanoic acid, 2-methyl-, 2-methylpropyl ester	Ester	sweet, fruity	0.0584264	insig
p-Mentha-1,8-dien-7-ol	Terpenoids	green, cumin, spicy, aromatic, woody, cardamom, floral, waxy, violet	0.0499314	insig
3-Mercaptohexyl acetate	Ester	sulfur, grapefruit, andfruity	0.0472496	insig
Cyclopentaneacetic acid, 3-oxo-2-pentyl-, methyl ester	Ester	floral, oily, jasmin, green, lactonic, tropical, natural	0.0430489	insig
(3S,3aR,6R,8aS)-3,7,7-Trimethyl-8-methylenehexahydro-1H-3a,6-methanoazulen-2(3H)-one	Terpenoids	-	0.0411223	insig
2H-1-Benzopyran-2-one, 4-hydroxy-	Heterocyclic compound	-	0.0394572	insig
1-Hexanol, 3,5,5-trimethyl-	Alcohol	grassy, green, weedy, floral, earthy, aldehydic, hay, straw, leaf	0.0380226	insig
3-Butylisobenzofuran-1(3H)-one	Heterocyclic compound	herbal, phenolic, celery	0.027018	insig
Cyclohexanone, 2-(1-mercapto-1-methylethyl)-5-methyl-	Ketone	sulfury, minty, green, fruity, berry, buchu, fruity, tropical, peach	0.0223917	insig
1-Oxaspiro[4.5]dec-6-ene, 2,6,10,10-tetramethyl-	Terpenoids	tea, herbal, green, wet, tobacco, leaf, metallic, woody, spicy	0.0210865	insig
2(3H)-Furanone, 5-butyldihydro-4-methyl-	Heterocyclic compound	tonka, coumarin, coconut, toasted, nutty, celery, burnt	0.0127305	insig
Isobutyl acetate	Ester	sweet, fruity, ethereal, banana, tropical	0.0117941	insig
1,2,4,5-Tetrazine-3,6-diAmine	Heterocyclic compound	-	0.00220852	insig
Citronellyl tiglate	Terpenoids	rose, fruity, floral, geranium, leafy, tea	0.000816777	insig
